# Supplementary material for: Glycosylation of a Capsule-Like Complex (CLC) by Francisella novicida Is Required for Virulence and Partial Protective Immunity in Mice
Source: PubMed Central journal article supplement (PMC5447757; doi:10.3389/fmicb.2017.00935), 2017-05-30
Supplement: Table2.pdf [file Table2.pdf]

**Table S2. Carbohydrate Content of *F. novicida* Transposon Mutants Compared to Parent**

| <b>Strain</b>                        | <b>Transposon<br/>Insertion Location</b> | <b>Carbohydrate of Crude Urea<br/>Extract<br/>(<math>\mu\text{g}/\text{gram}</math> of bacterial wet<br/>weight)<br/>(n = 3)<sup>a</sup></b> |
|--------------------------------------|------------------------------------------|----------------------------------------------------------------------------------------------------------------------------------------------|
| <i>F. novicida</i> _P10 <sup>b</sup> | N/A                                      | 4078 $\pm$ 415                                                                                                                               |
| tnfn1_pw060323p05q162                | FTN_1212                                 | 3329 $\pm$ 596                                                                                                                               |
| tnfn1_pw060323p03q152                | FTN_1213                                 | 2866 $\pm$ 613                                                                                                                               |
| tnfn1_pw060328p06q149                | FTN_1214                                 | 3831 $\pm$ 544                                                                                                                               |
| tnfn1_pw060323p05q110                | FTN_1215                                 | 3532 $\pm$ 545                                                                                                                               |
| tnfn1_pw060420p04q184                | FTN_1216                                 | 3392 $\pm$ 641                                                                                                                               |
| tnfn1_pw060418p03q107                | FTN_1218                                 | 3171 $\pm$ 393                                                                                                                               |
| tnfn1_pw060323p07q127                | FTN_1219                                 | 3597 $\pm$ 192                                                                                                                               |

<sup>a</sup> Comparison of carbohydrate content of urea extracts of *F. novicida*\_P10 and subcultured *F. novicida* transposon mutants was done with a One-Way ANOVA. No significant differences were found ( $p$ -value > 0.05).

<sup>b</sup>The parent and all mutants were subcultured daily in CDMB for 10 days, followed by growth on CDMA at 32°C to enhance CLC expression.
